# Supplementary material for: Excitation of medium spiny neurons by ‘inhibitory’ ultrapotent chemogenetics via shifts in chloride reversal potential
Source: eLife. 2021 Apr 6;10:e64241. doi: 10.7554/eLife.64241 (PMC8024007; doi:10.7554/eLife.64241)
Supplement: Figure 1—source data 1. [file elife-64241-fig1-data1.xlsx]

## Sheet: Sheet1
Figure 1D														Figure 1E
	PSAM4-GlyR														PSAM4-GlyR
Saline	20	7.14286	49.6703	17.4346	29.41	52	31	19						Saline	11.0618	4.87665	11.3163	12.6407	8.28	8	11	12
Fentanyl	38.1786	42	44.8305	6.93	26.69	20	32	33	46					Fentanyl	9.53878	10.7087	11.987	8.72	10.7	5	7	17	12
	Control														Control
Saline	15.7895	4.71698	5.31915	2.83019	8.44206	13.7255	16.4258	14.1498	12.6065	15.5994	17.0098	18.0819		Saline	10.0256	3.88769	4.80905	1.87314	9.87985	6.10228	4.85886	6.88483	6.4587	11.0273	11.9238	13.4073
Fentanyl	9.45205	12.753	14.8352	12.31	15.35	5	19	8	5					Fentanyl	9.26847	6.03113	5.44588	7.04	17.59	10	24	6	5
