# Supplementary material for: Excitation of medium spiny neurons by ‘inhibitory’ ultrapotent chemogenetics via shifts in chloride reversal potential
Source: eLife. 2021 Apr 6;10:e64241. doi: 10.7554/eLife.64241 (PMC8024007; doi:10.7554/eLife.64241)
Supplement: Figure 2—source data 1. [file elife-64241-fig2-data1.xlsx]

## Sheet: Sheet1
Figure 2B				Figure 2D
10 nM	50 nM	100 nM		aCSF	10 nM	aCSF	50 nM
12.3699	-198.827	-178.33		93.3707	84.0336	88.1057	42.6621
-10.3727	-134.971	-191.393		79.9361	66.0502	62.7746	44.2478
-11.523	-129.224	-1014.51		125.471	105.485	48.9476	42.4809
-19.0672	-155.278	-607.508		36.2976	47.5737	77.1605	47.8698
-107.011	-89.8	-268.6		67.1592	68.5401	140.449	91.9118
-4.97467	-214.569	-200.327		49.6524	43.9754	82.9187	45.683
-43.6939	-56.3637			64.6412	49.9002	39.8248	32.1647
-53.1741	-281.016			48.5673	50.3525	49.6524	48.6145
-17.6566	-180.072			81.367	72.0461	84.317	59.0667
-53.4518	-633.786					109.17	24.1313
-41.6577	-227.246					64.6412	39.968
-72.792	-109.493					40.7498	47.9157
-31.044	-537.804					85.1789	35.2609
-60.0813	-570.132					81.367	32.7225
-34.734	-94.1055					91.3242	74.3494
-108.132	-230.601					98.5222	58.309
5.96343	-964.524					82.7815	43.6872
-18.9619	-150.319					107.759	91.1577
-23.2238
-22.4283
-187.839
