# Supplementary material for: Excitation of medium spiny neurons by ‘inhibitory’ ultrapotent chemogenetics via shifts in chloride reversal potential
Source: eLife. 2021 Apr 6;10:e64241. doi: 10.7554/eLife.64241 (PMC8024007; doi:10.7554/eLife.64241)
Supplement: Figure 3—source data 1. [file elife-64241-fig3-data1.xlsx]

## Sheet: Sheet1
Figure 3A					Figure 3C				Figure 3E					Figure 3F					Figure 3G					Figure 3H					Figure 3I
10 nM	10 nM	50 nM	50 nM			10 nM	50 nM		10 nM	10 nM	50 nM	50 nM		current	# of APs (mean)	# of APs (SEM)	# of APs (n)		current	freq of APs (mean)	freq of APs (SEM)	freq of APs (n)		current	# of APs (mean)	# of APs (SEM)	# of APs (n)		current	freq of APs (mean)	freq of APs (SEM)	freq of APs (n)
control	PSAM4-GlyR	control	PSAM4-GlyR		induced firing	14	9		control	PSAM4-GlyR	control	PSAM4-GlyR		aCSF					aCSF					aCSF					aCSF
4.82	19.7886	6.1622	26.94		spontaneous firing	0	1		0	-100	0	0		0	0	0	7		0	0	0	7		0	0	0	10		0	0	0	10
2.51	1.7266	2.0889	6.2633		DP block	0	6		0	50	-50	-100		50	2.57143	2.57143	7		50	1.24319	1.24319	7		50	0	0	10		50	0	0	10
2.74	0.7856	5.89	9.2158						50	50	50	-50		100	7.28571	6.79886	7		100	9.35706	6.32299	7		100	3	3	10		100	1.58861	1.58861	10
-1.86	0.13595	4.15	10.8126						0	50	50	50		150	15.2857	7.38955	7		150	17.7126	8.33553	7		150	7.33333	5.00278	9		150	5.73001	3.95779	9
	3.15	1.32	1.62							0	50	-300		200	24	9.94509	7		200	19.6785	7.69454	7		200	21.1111	8.93098	9		200	17.1176	6.22289	9
	17.67	3.84	28.026							0	50	0		250	26	12.7092	7		250	26.9799	10.0658	7		250	32.4444	10.3079	9		250	26.3112	5.85414	9
	4.89	-0.34	7.63							50	0	100		300	38	12.657	6		300	44.1645	12.7601	6		300	18.5	6.11497	8		300	30.6772	7.1721	8
	4.77		38.88							50		-200		350	32.8	7.43909	5		350	43.3372	5.94411	5		350	12.7143	3.68209	7		350	40.2582	9.20747	7
	19.1		9.98							0		50		400	19	6.82642	5		400	60.6472	11.113	5		400	16.2857	5.54511	7		400	49.6944	9.02232	7
	-0.37		20.17							50		-100		450	14	4.22295	4		450	57.6429	7.7945	4		450	20.6	10.8517	5		450	53.1285	12.7909	5
	0.94		41.84							100
	1.04		38.7							0				50 nM					50 nM					50 nM					50 nM
	4.15		7.32							50				0	0	0	7		0	0	0	7		0	6.1	6.1	10		0	3.05	3.05	10
	12.21		24.04							-100				50	0.285714	0.285714	7		50	0.31039	0.31039	7		50	6.3	3.21818	10		50	3.47818	1.7935	10
			28.32											100	2.14286	1.83132	7		100	6.57711	5.10803	7		100	10.1	7.37481	10		100	6.18093	4.28922	9
			34.15											150	9.42857	6.10954	7		150	12.4166	7.36859	7		150	13.1111	7.18688	9		150	8.69479	4.06198	9
														200	18.2857	8.8121	7		200	15.3947	6.34888	7		200	13.2222	5.00216	9		200	16.5239	5.99034	9
														250	18.2857	10.3802	7		250	23.6994	8.93035	7		250	19.5556	8.32184	9		250	38.9545	17.6916	9
														300	17.6667	6.91215	6		300	39.7428	11.5566	6		300	24.25	10.8673	8		300	31.1451	7.32682	8
														350	19	5.10882	5		350	40.4598	7.26001	5		350	22.5714	10.7678	7		350	46.2815	20.6375	7
														400	14.6	5.54617	5		400	52.6413	12.9028	5		400	18.8571	11.2872	7		400	29.7453	10.6715	7
														450	10.5	3.96863	4		450	44.0735	7.49685	4		450	28.2	15.1934	5		450	46.5387	9.13206	5
