# Supplementary material for: Excitation of medium spiny neurons by ‘inhibitory’ ultrapotent chemogenetics via shifts in chloride reversal potential
Source: eLife. 2021 Apr 6;10:e64241. doi: 10.7554/eLife.64241 (PMC8024007; doi:10.7554/eLife.64241)
Supplement: Figure 4—source data 1. [file elife-64241-fig4-data1.xlsx]

## Sheet: Sheet1
Figure 4B			Figure 4D
control	PSAM4-GlyR		control			PSAM4-GlyR
32.7754	2.03874		acsf	uPSEM	high K+	acsf	uPSEM	high K+
16.1364	34.7174		0	0	7.08496	1.89167	8.37039	0
13.9373	28.0188		0	0	4.2735	0	1.466	0
5.29279	17.163		0	0	5.28123	0.004167	0.55003
21.2462			0	0.39854	1.14379	0	2.01555	0
18.3453						0	3.75215	0
11.5702
12.4486
9.19042
35.7407
17.0573
