# Supplementary material for: Excitation of medium spiny neurons by ‘inhibitory’ ultrapotent chemogenetics via shifts in chloride reversal potential
Source: eLife. 2021 Apr 6;10:e64241. doi: 10.7554/eLife.64241 (PMC8024007; doi:10.7554/eLife.64241)
Supplement: Figure 5—source data 1. [file elife-64241-fig5-data1.xlsx]

## Sheet: Sheet1
Figure 5C					Figure 5D					Figure 5E			Figure 5G					Figure 5H
Vm	I (mean)	I (SEM)	I (n)		Vm	I (mean)	I (SEM)	I (n)		I-transient	I-steady-state		Vm	I (mean)	I (SEM)	I (n)		G	Erev shift
control					transient								control					14.6878	23.17
-118	62.8636	69.2927	11		-118	-422.738	93.2803	21		-55.49	-32.32		-118	-25.9371	20.7832	11		11.3798	6.63
-108	13.3182	48.2964	11		-108	-392.152	68.6398	21		-66.33	-59.7		-108	-29.7109	20.7024	11		8.12723	13.13
-98	-23.8545	31.267	11		-98	-364.843	51.0517	21		-54.36	-41.23		-98	-35.2327	20.2497	11		9.56654	5.66
-88	-37.3909	17.6485	11		-88	-312.652	35.9958	21		-64.93	-59.27		-88	-36.4692	17.3001	11		11.9288	14.74
-78	-20.6727	9.12528	11		-78	-217.219	25.9186	21		-63.01	-48.27		-78	-35.9979	13.254	11		7.07282	1.26
-68	8.46364	13.5051	11		-68	-96.7476	24.2824	21		-74.13	-72.87		-68	-36.7581	11.3688	11		6.67887	15.83
-58	31.0273	21.824	11		-58	47.6143	29.5323	21		-47.02	-31.19		-58	-33.449	11.6205	11		5.3015	2.22
-48	55.7636	31.5753	11		-48	198.971	44.6549	21		-63.29	-61.07		-48	-30.9646	12.1831	11		34.0782	30.36
-38	61.5545	47.0066	11		-38	296.671	41.4258	21		-70.86	-40.5		-38	-25.161	13.9291	11		12.8818	0.31
-28	50.9091	70.9427	11		-28	336.376	57.3266	21		-74.12	-73.81		-28	-21.3536	15.5957	11		4.64476	6.59
										-54.22	-47.63							17.5132	41.73
PSAM4-GlyR					steady-state					-57.76	-16.03		PSAM4-GlyR					21.251	24.23
-118	-422.738	93.2803	21		-118	-73.4795	52.5199	21		-63.78	-39.55		-118	-143.397	19.977	21		5.30138	6.8
-108	-392.152	68.6398	21		-108	-174.65	41.32	21		-66.93	-60.13		-108	-183.3	19.1269	21		9.03336	13.11
-98	-364.843	51.0517	21		-98	-267.038	36.4106	21		-64.62	-51.51		-98	-239.245	24.4339	21		16.0685	12.75
-88	-312.652	35.9958	21		-88	-311.846	36.2545	21		-54.12	-41.37		-88	-311.141	36.0848	21		7.34623	25.55
-78	-217.219	25.9186	21		-78	-286.749	38.1148	21		-59.06	-33.51		-78	-402.71	54.1701	21		8.50996	9.3
-68	-96.7476	24.2824	21		-68	-225.635	39.4567	21		-62.9	-53.6		-68	-519.711	78.4948	21		24.1561	26.05
-58	47.6143	29.5323	21		-58	-144.704	37.0076	21		-63.65	-37.6		-58	-664.944	110.175	21		9.11704	30.75
-48	198.971	44.6549	21		-48	-33.2563	29.6457	21		-59.12	-28.37		-48	-813.42	148.391	21		13.371	6.39
-38	296.671	41.4258	21		-38	67.6849	24.6851	21		-55.28	-48.89		-38	-995.322	190.387	21
-28	336.376	57.3266	21		-28	69.6784	34.4578	21					-28	-1153.71	231.116	21
