# Supplementary material for: Excitation of medium spiny neurons by ‘inhibitory’ ultrapotent chemogenetics via shifts in chloride reversal potential
Source: eLife. 2021 Apr 6;10:e64241. doi: 10.7554/eLife.64241 (PMC8024007; doi:10.7554/eLife.64241)
Supplement: Figure 6—source data 1. [file elife-64241-fig6-data1.xlsx]

## Sheet: Sheet1
Figure 6C					Figure 6D
Vm	I (mean)	I (SEM)	I (n)		Vm	I (mean)	I (SEM)	I (n)
aCSF					aCSF
-118	-44.7707	7.93842	5		-118	-22.6619	0.211708	3
-108	-39.9806	7.20213	5		-108	-26.1875	3.87051	3
-98	-40.8509	6.47939	5		-98	-23.6153	0.553882	3
-88	-33.3639	5.97621	5		-88	-22.3252	5.31346	3
-78	-32.4938	6.21356	5		-78	-15.7131	3.77518	3
-68	-19.5717	3.92823	5		-68	-7.88902	3.74204	3
-58	3.7373	6.25235	5		-58	16.3677	5.26265	3
-48	42.0791	8.80656	5		-48	45.2181	5.32171	3
-38	80.4933	18.202	5		-38	52.6717	1.63259	3
-28	116.817	30.9572	5		-28	58.3734	13.1054	3
uPSEM					uPSEM
-118	-8.38863	2.22636	5		-118	-26.2565	0.373666	3
-108	-9.39087	3.96634	5		-108	-27.9155	4.36858	3
-98	-7.18457	2.09774	5		-98	-19.7234	4.52556	3
-88	-7.77433	1.32973	5		-88	-23.7237	1.37389	3
-78	-7.28225	2.26039	5		-78	-18.3855	2.23702	3
-68	-6.72649	1.80804	5		-68	-9.24694	1.26749	3
-58	-8.40429	0.739172	4		-58	20.1847	2.8794	3
-48	4.68165	3.06827	5		-48	29.4293	8.35198	3
-38	2.77747	3.51573	5		-38	42.6799	5.16549	3
-28	3.64899	4.76786	5		-28	60.7252	16.2452	3
